# Supplementary material for: From Tear to Fear: Posttraumatic Stress Disorder in Patients With Acute Type A Aortic Dissection
Source: PubMed Central journal article supplement — J Am Heart Assoc. 2020 Apr 28;9(9):e015060. doi: 10.1161/JAHA.119.015060 (PMC7428551; doi:10.1161/jaha.119.015060), 2020-04-28
Supplement: JAH3-9-e015060-s001.pdf [file JAH3-9-e015060-s001.pdf]

# **SUPPLEMENTAL MATERIAL**

**Figure S1. Four-item posttraumatic stress disorder (PTSD) survey questions.**

| Questions                                                                                                         | Patient Response |
|-------------------------------------------------------------------------------------------------------------------|------------------|
| <i>With regard to your dissection (please circle the following):</i>                                              |                  |
| 1. Have you had nightmares about it or thought about it when you did not want to?                                 | Yes or No        |
| 2. Have you tried hard not to think about it or went out of your way to avoid situations that reminded you of it? | Yes or No        |
| 3. Were you constantly on guard, watchful, or easily startled after your aortic dissection?                       | Yes or No        |
| 4. Did you feel numb or detached from others, activities, or your surroundings after your aortic dissection?      | Yes or No        |

Patients were instructed to answer the questions specifically “with regard to your dissection” so that the PTSD identified was attributed only to the dissection event.
